# Supplementary material for: Effective Use of Sugarcane-Bagasse-Derived KOH-Activated Biochar for Remediating Norfloxacin-Contaminated Water
Source: MDPI journal article supplement (doi:10.3390/toxics11110908), 2023-11-06
Supplement: s1 [file s1]

**Table S1.** Comparison of various modified biochar materials for remediation of organic pollutants.

| Biochar (Biomass)                                         | Biochar modification                    | Biochar preparation condition | pollutant                       | Adsorption efficiency (mg·g <sup>-1</sup> ) | References        |
|-----------------------------------------------------------|-----------------------------------------|-------------------------------|---------------------------------|---------------------------------------------|-------------------|
| GO-BC<br>(Bamboo sawdust)                                 |                                         | Pyrolysis at 600 °C           | Sulfamethazine                  | 23.42                                       | S1<br>[1]         |
| CRB<br>(Crab shell)                                       | Calcium-rich biomass                    | Pyrolysis at 800 °C           | Chlortetracycline hydrochloride | 70                                          | S2<br>[2]         |
| MRBC<br>(Reed)                                            | Magnetization                           | Pyrolysis at 600 °C           | Florfenicol                     | 9.29                                        | S3<br>[3]         |
| AMB<br>(Corn stalks, reed stalks and willow branches)     | ZnCl <sub>2</sub> and FeCl <sub>3</sub> | Pyrolysis at 500 °C           | Norfloxacin                     | 7.6249                                      | S4<br>[4]         |
| APB<br>(Potato stem and natural attapulgite)              | —                                       | Pyrolysis at 500 °C           | Norfloxacin                     | 5.24                                        | S5<br>[5]         |
| GAB<br>(Algal)                                            | H <sub>3</sub> PO <sub>4</sub>          | Pyrolysis at 450 °C           | Norfloxacin                     | 86                                          | S6<br>[6]         |
| SCGB<br>(Coffee grounds)                                  | —                                       | Pyrolysis at 500 °C           | Norfloxacin                     | 69.8                                        | S7<br>[7]         |
| <b>3K-SCB<sub>750</sub></b><br><b>(Sugarcane bagasse)</b> | <b>NaOH</b>                             | <b>Pyrolysis at 750 °C</b>    | <b>Norfloxacin</b>              | <b>157.4</b>                                | <b>This study</b> |

## Reference

- Huang, D., et al., Sorptive removal of ionizable antibiotic sulfamethazine from aqueous solution by graphene oxide-coated biochar nanocomposites: influencing factors and mechanism. *Chemosphere*, 2017. 186: p. 414-421.
- Xu, Q., et al., Interaction between chlortetracycline and calcium-rich biochar: Enhanced removal by adsorption coupled with flocculation. *Chemical Engineering Journal*, 2020. 382: p. 122705.
- Zhao, H. and Y. Lang, Adsorption behaviors and mechanisms of florfenicol by magnetic functionalized biochar and reed biochar. *Journal of the Taiwan Institute of Chemical Engineers*, 2018. 88: p. 152-160.
- Wang, B., et al., Preparation of biochar by simultaneous carbonization, magnetization and activation for norfloxacin removal in water. *Bioresource Technology*, 2017. 233.
- Li, Y., et al., Removal of Norfloxacin from aqueous solution by clay-biochar composite prepared from potato stem and natural attapulgite. *Colloids and Surfaces A: Physicochemical and Engineering Aspects*, 2017. 514: p. 126-136.
- Zhang, T., et al., Engineering mesoporous algal-based biochars for efficient remediation of norfloxacin pollution in marine environment. *Environmental Advances*, 2022. 9: p. 100302.
- Nguyen, V.-T., et al., Adsorption of norfloxacin from aqueous solution on biochar derived from spent coffee ground: Master variables and response surface method optimized adsorption process. *Chemosphere*, 2022. 288: p. 132577.
